# Supplementary material for: Amphiphobic fluorinated polyurethane composite microfibrous membranes with robust waterproof and breathable performances
Source: Royal Society of Chemistry journal article supplement (doi:10.1039/c2ra22111j), 2012-12-21
Supplement: c2ra22111j.pdf [file c2ra22111j.pdf]

**Amphiphobic fluorinated polyurethane composite microfibrrous membranes  
with robust waterproof and breathable performances**

**Jianfeng Ge,<sup>‡a,b</sup> Yang Si,<sup>‡a,b</sup> Fen Fu,<sup>a,b</sup> Jialin Wang,<sup>a,b</sup> Jianmao Yang,<sup>c</sup> Lingxiao Cui,<sup>a,b</sup> Bin  
Ding,<sup>\*a,b</sup> Jianyong Yu<sup>b</sup> and Gang Sun<sup>b</sup>**

<sup>a</sup> State Key Laboratory for Modification of Chemical Fibers and Polymer Materials, College of Materials Science and Engineering, Donghua University, Shanghai 201620, China. E-mail: binding@dhu.edu.cn

<sup>b</sup> Nanomaterials Research Center, Modern Textile Institute, Donghua University, Shanghai 200051, China

<sup>c</sup> Research Center for Analysis and Measurement, Donghua University, Shanghai 201620, China

<sup>‡</sup> These authors contributed equally to this work.

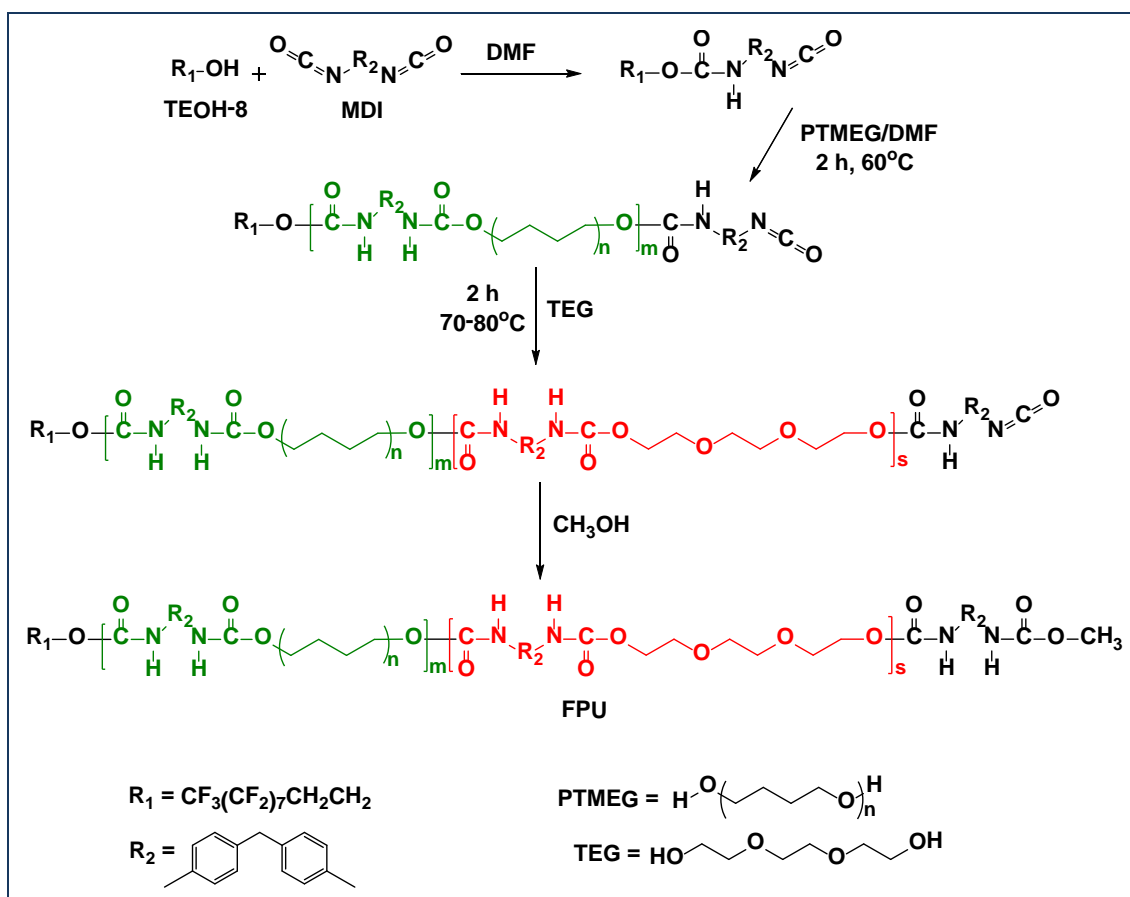

**Fig. S1** Chemical synthetic and polymerization routes of FPU.

## <sup>1</sup>H nuclear magnetic resonance (NMR) spectroscopic analysis

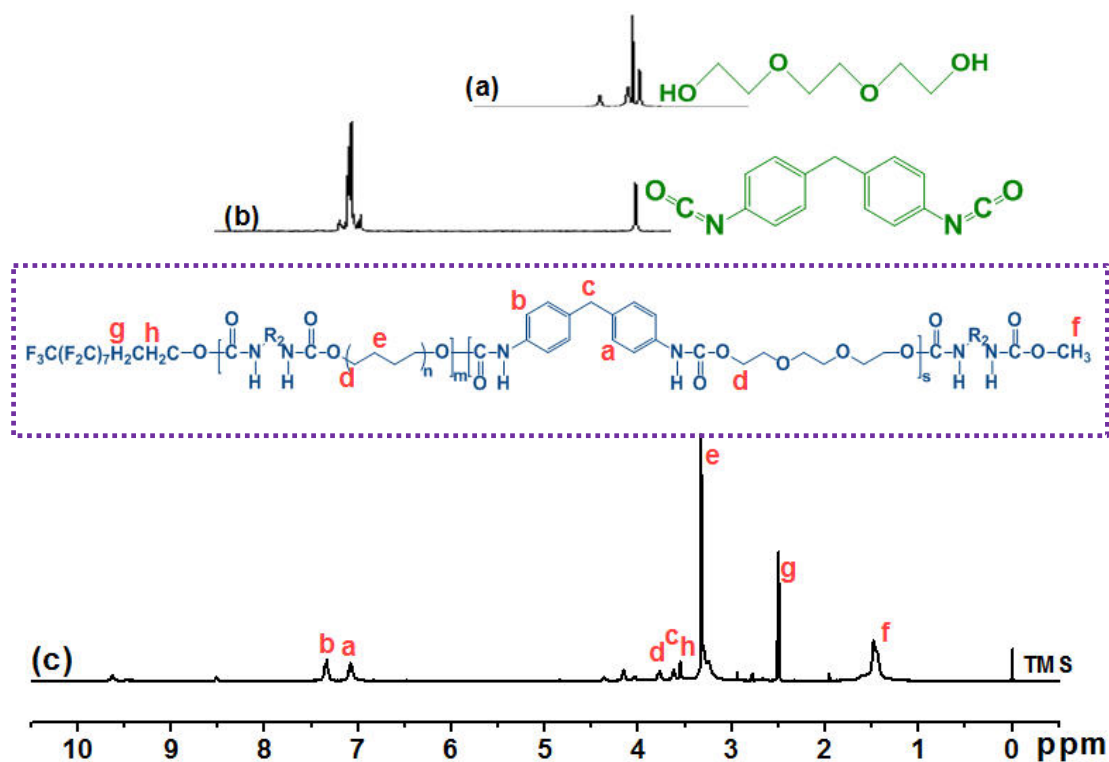

**Fig. S2** <sup>1</sup>H NMR spectrograph of (a) TEG, (b) MDI and (c) FPU.

The as-synthesized FPU after purification and crystallization was subjected to nuclear magnetic resonance (NMR) spectroscopic analysis. Figure S1 illustrates the <sup>1</sup>H NMR spectrum of FPU. For pure TEG, the chemical shifts for -CH<sub>2</sub>- and -OH appeared between 3.60 to 3.72 ppm and around 4.01 ppm, respectively. In case of pure MDI the signals for aromatic protons appeared between 6.90 to 7.16 ppm and for -CH<sub>2</sub>- appeared at 3.89 ppm (Fig. S2a and b). For FPU, the chemical shift for terminal -CH<sub>3</sub>, -CF<sub>2</sub>-CH<sub>2</sub>- and -CH<sub>2</sub>-CH<sub>2</sub>-O appeared at 1.45, 2.53 and 3.52 ppm, respectively. The aromatic protons of the MDI in FPU have given their chemical shift between 7.13 to 7.48 ppm. Comparing to the <sup>1</sup>H NMR of TEG the protons of O-CH<sub>2</sub>-CH<sub>2</sub>-O

have given their signal at 3.78 ppm, and protons of PTMEG have given a sharp signal at 3.34 ppm.

### <sup>19</sup>F NMR spectroscopic analysis

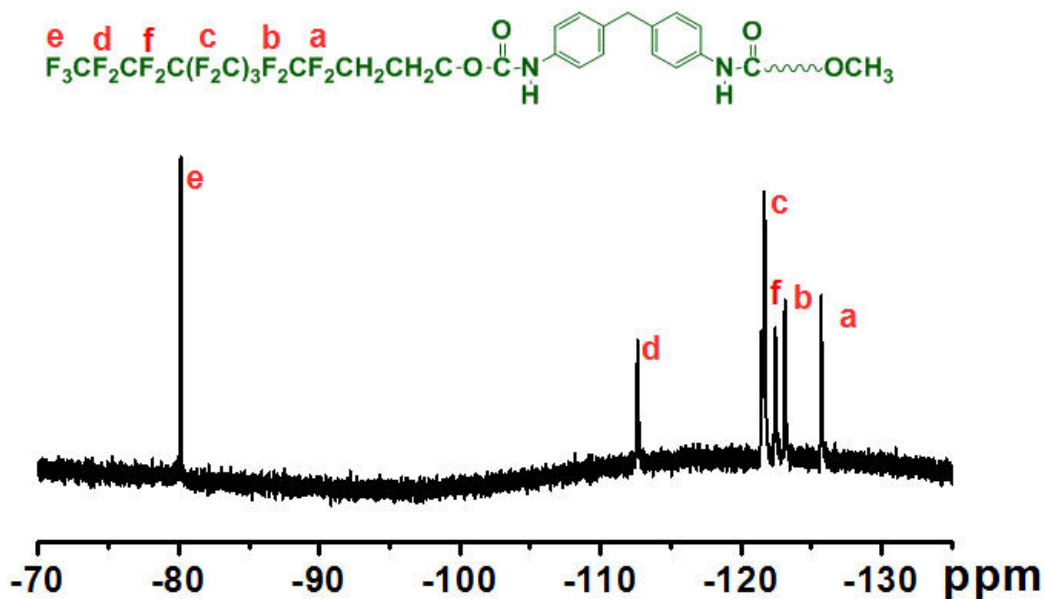

**Fig. S3** <sup>19</sup>F NMR spectrograph of FPU.

<sup>19</sup>F NMR has given further structural affirmation of FPU (Fig. S3). The chemical shift for terminal -CF<sub>3</sub> appeared at 80.13 ppm, while for -CF<sub>2</sub>-CH<sub>2</sub>- appeared at 125.67 ppm. The remaining -CF<sub>2</sub>- has given their chemical shift between 112.61 to 123.10 ppm. Acquisition of quantitative results from NMR analysis has confirmed the chemical structure of FPU.

### Functional group affirmation of FPU by FT-IR spectroscopy analysis

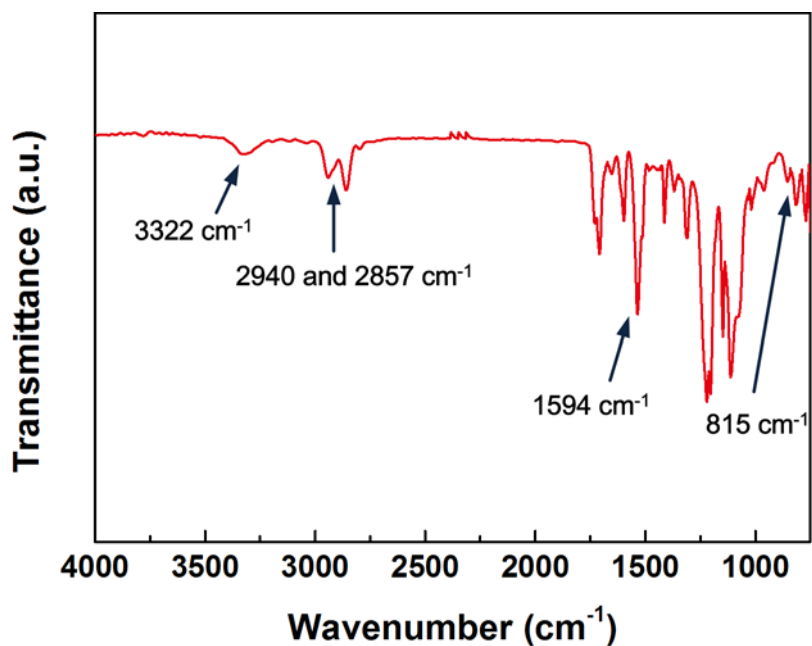

**Fig. S4** FT-IR spectrum of FPU.

Fig. S4 shows the comparative FT-IR spectrum of FPU. The typical absorption features for carbamate group were found at 3322 cm<sup>-1</sup> (-N-H), 1708 cm<sup>-1</sup> (C=O), and 1112 cm<sup>-1</sup> (C-O-C), respectively. The -CH<sub>2</sub>- specific for PTMEG has given their absorption band around 2940 and 2857 cm<sup>-1</sup>. The stretching vibrations for aromatic ring of MDI and terminal CF<sub>3</sub> and deformation vibration for -CF<sub>2</sub>- appeared at 1594 and 815 cm<sup>-1</sup>, respectively.

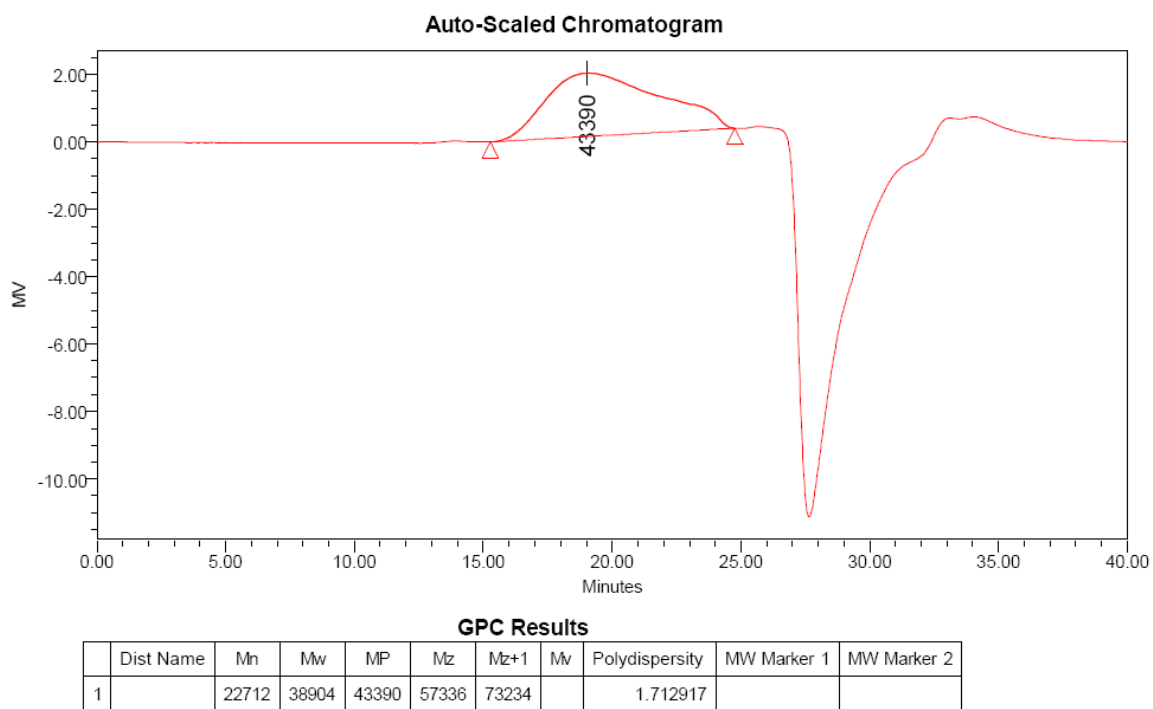

**Fig. S5** GPC curve of as-synthesized FPU and relevant molecular weight and distribution results.

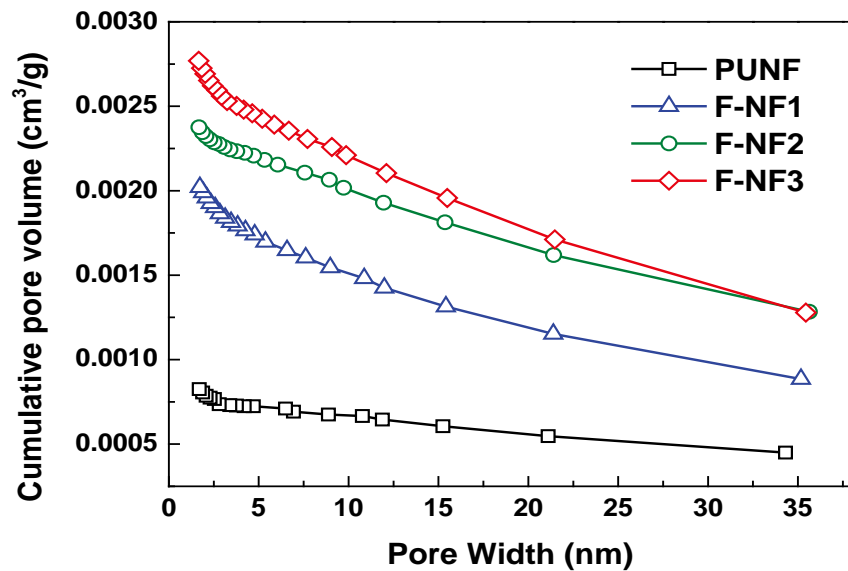

**Fig. S6** The BJH desorption cumulative pore volume curves of relevant PUNF, F-NF1, F-NF2 and F-NF3 membranes.
